# Supplementary material for: A proteomic study of Shengmai injection's mechanism on preventing cardiac ischemia-reperfusion injury via energy metabolism modulation
Source: Royal Society of Chemistry journal article supplement (doi:10.1039/c4mb00161c), 2014-11-14
Supplement: c4mb00161c1.pdf [file c4mb00161c1.pdf]

**Additional Electronic Supplementary Information uploaded on 27<sup>th</sup> November 2015.**

**This version replaces the version uploaded on the 14<sup>th</sup> November 2014.**

**Table 1** Chemical structures and concentrations of major components in SMI

| Structure                                                                           | Component       | R <sub>1</sub>        | R <sub>2</sub>        | Concentration (μg/mL) |
|-------------------------------------------------------------------------------------|-----------------|-----------------------|-----------------------|-----------------------|
| 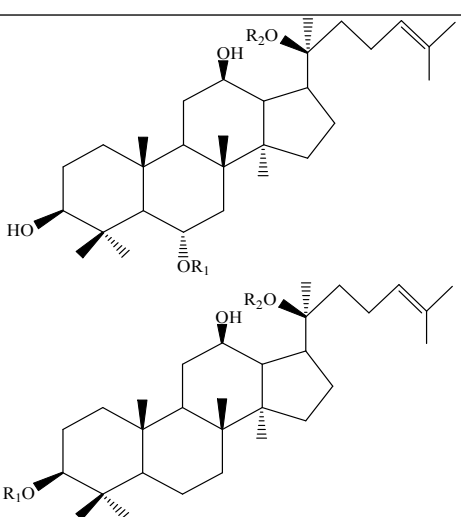   | Ginsenoside Rg1 | Glc                   | Glc                   | 129.6                 |
|                                                                                     | Ginsenoside Re  | Glc <sup>2</sup> -Rha | Glc                   | 100.6                 |
|                                                                                     | Ginsenoside Rf  | Glc <sup>2</sup> -Glc | H                     | 38.50                 |
|                                                                                     | Ginsenoside Rg2 | Glc <sup>2</sup> -Rha | H                     | 25.58                 |
|                                                                                     | Ginsenoside Rb1 | Glc <sup>2</sup> -Glc | Glc <sup>6</sup> -Glc | 221.7                 |
|                                                                                     | Ginsenoside Rd  | Glc <sup>2</sup> -Glc | Glc                   | 45.60                 |
|                                                                                     | Ginsenoside Rc  | Glc <sup>2</sup> -Glc | Glc <sup>6</sup> -Ara | 145.2                 |
|   | Schisandrin     |                       |                       | 13.70                 |
|  | Schisandrol B   |                       |                       | 0.6574                |
|  | Schizandrin B   |                       |                       | 0.0327                |
|  | Ophiopogonin D  |                       |                       | 0.0054                |

**Table 2** Characterization of the identified altered proteins and relative spot intensity of their spot volumes

| Spot number <sup>a</sup>    | Protein identity                                 | NCBI accession number | (Theoretical values)pI/kDa | Peptide count | Sequence coverage (%) | Score | Relative spot intensity % (Sham, 100) |            |
|-----------------------------|--------------------------------------------------|-----------------------|----------------------------|---------------|-----------------------|-------|---------------------------------------|------------|
|                             |                                                  |                       |                            |               |                       |       | IR                                    | IR+SMI     |
| Glucose metabolism proteins |                                                  |                       |                            |               |                       |       |                                       |            |
| 1                           | Triosephosphate isomerase                        | 124056485             | 6.89/27                    | 13            | 43                    | 80    | 72±33.9*                              | 123±67.1#  |
| 2                           | Pyruvate dehydrogenase E1 component subunit beta | 122065728             | 6.20/40                    | 4             | 12                    | 58    | 58±28.7**                             | 110±62.0#  |
| 3                           | Aldose reductase                                 | 6978491               | 6.26/36                    | 16            | 36                    | 165   | 57±39.4*                              | 106±80.8   |
| 4                           | L-lactate dehydrogenase B chain                  | 1170739               | 5.70/37                    | 11            | 14                    | 85    | 63±45.0*                              | 104±21.1#  |
| 5                           | Aldolase A                                       | 202837                | 8.31/39                    | 17            | 38                    | 463   | 41±7.2*                               | 102±21.3## |
| Lipid metabolism proteins   |                                                  |                       |                            |               |                       |       |                                       |            |
| 6                           | Short-chain specific acyl-CoA dehydrogenase      | 11968090              | 8.47/45                    | 17            | 23                    | 296   | 160±33.5*                             | 107±29.9   |
| 7                           | 3-ketoacyl-CoA thiolase                          | 149027157             | 8.64/38                    | 14            | 31                    | 140   | 166±45.1*                             | 98±39.8#   |
| TCA cycle protein           |                                                  |                       |                            |               |                       |       |                                       |            |
| 8                           | Malate dehydrogenase                             | 81861572              | 6.16/36                    | 10            | 23                    | 124   | 62±31.6*                              | 106±67.5   |
| Rsp-Chain protein           |                                                  |                       |                            |               |                       |       |                                       |            |
| 9                           | ATP synthase, H <sup>+</sup> transporting        | 149029483             | 8.24/55                    | 24            | 34                    | 267   | 35±18.9*                              | 70±32.9#   |
| 10                          | ATP synthase subunit beta                        | 114562                | 5.19/56                    | 7             | 7                     | 173   | 67±23.6*                              | 96±32.9#   |
| 11                          | Creatine kinase M-type                           | 6978661               | 6.58/43                    | 13            | 29                    | 182   | 185±44.8*                             | 115±79.1   |
| Other proteins              |                                                  |                       |                            |               |                       |       |                                       |            |
| 12                          | Cytokeratin-6A                                   | 123781839             | 8.06/59                    | 15            | 24                    | 87    | 75±23.5*                              | 104±48.0#  |
| 13                          | Tu translation elongation factor                 | 149067905             | 7.65/44                    | 17            | 31                    | 321   | 79±50.2**                             | 120±102.3  |
| 14                          | rCG27551, isoform CRA_a                          | 149041248             | 8.45/21                    | 5             | 15                    | 101   | 71±28.4*                              | 109±53.0   |

<sup>a</sup> The marked spot number in Fig. 2(A). \*  $P < 0.05$ , \*\*  $P < 0.01$  vs. Sham group, #  $P < 0.05$ , ##  $P < 0.01$  vs. IR group
